# Supplementary material for: AC016745.3 Regulates the Transcription of AR Target Genes by Antagonizing NONO
Source: MDPI journal article supplement (doi:10.3390/life11111208), 2021-11-09
Supplement: s1 [file s1]

Supplementary Material

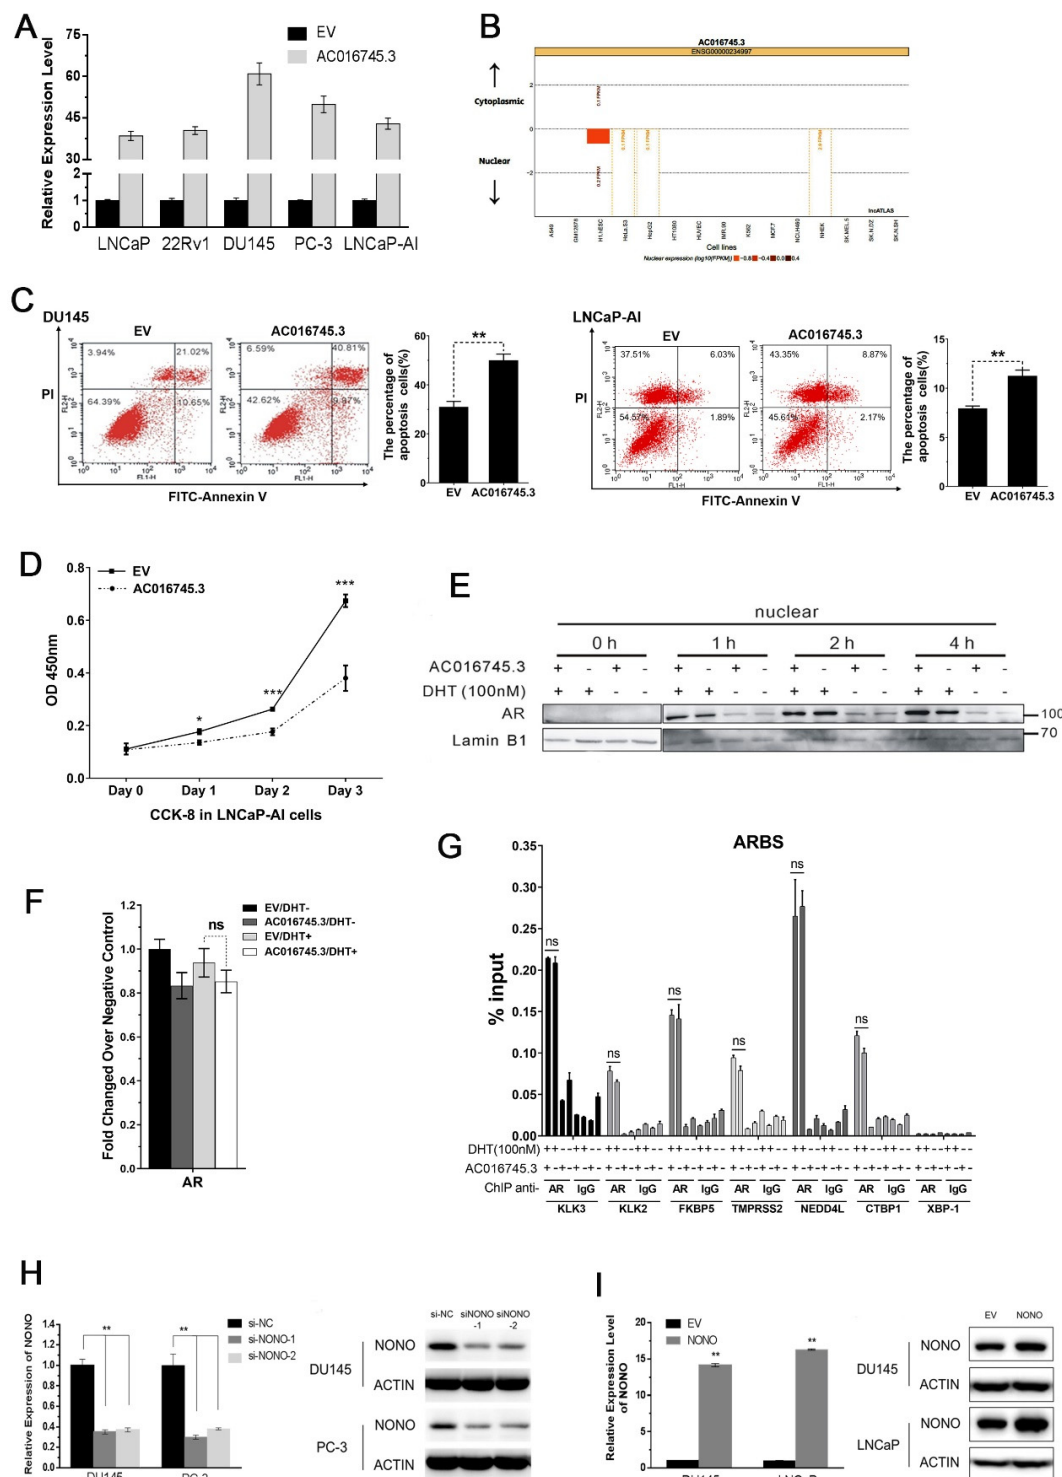

**Figure S1** (A) The transfection efficiency of high-expression plasmid pcDNA3.1- *AC016745.3* in prostate cancer cell lines. (B) The LncAtlas database was used to analyze the subcellular localization of *AC016745.3* in each cell line. (C) After highly expressing *AC016745.3* in prostate cancer cell lines DU145 and LNCaP-AI, stained with Annexin V/PI, and detected the changes of early and late apoptosis by FACScalibur flow cytometry. (D) After highly expressing *AC016745.3* in LNCaP-AI, the cell growth rate changes

were detected using CCK-8 Kit. (E) Western blot was used to detect AR entry into the nucleus after separation of nucleus and cytoplasm in LNCaP cells transfected with *AC016745.3* and treated with 10 nM DHT in time series of 0, 1, 2, and 4 h. Lamin B1 was used as a reference to the nucleus. (F) RT-PCR showed expression level of AR in LNCaP cells transfected with *AC016745.3* and treated with DHT. (G) ChIP-PCR assay detects the combination of AR and its ARE elements (*KLK3*, *KLK2*, *FKBP5*, *TMPRSS2*, *NEDD4L*, *CTBP1*, *XBP-1*) in LNCaP cells transfected with *AC016745.3* and treated with DHT. The result is the percentage of DNA in the input. (H-I) The efficiency of small interfering RNA of NONO and high-expression plasmid pcDNA3.1-NONO were confirmed by qRT-PCR and Western blot.

**Table S3.** siRNA sequences used in knockdown experiments.

| Name      | Sequence (5'to 3')    |
|-----------|-----------------------|
| si-NC     | UUCUCCGAACGUGUCACGUTT |
| si-AR-357 | GGAGCUCUCACAUGUGGAATT |
| si-AR-544 | GACAGUGUCACACAUUGAATT |
| si-NONO-1 | CCUAGCGGAGAUUGCCAAATT |
| si-NONO-2 | GCUCCUUUGAGUAUGAAUATT |

**Table S4.** Primers used in qPCR.

| Name             | Sequence (5'to 3')          |
|------------------|-----------------------------|
| $\beta$ -actin-F | CCTCTCCCAAGTCCACACAG        |
| $\beta$ -actin-R | GGGCACGAAGGCTCATCATT        |
| AC016745.3-F     | GGTGACGAAAATTCTACATTGCT     |
| AC016745.3-R     | ACCTGGCTGGTGTCTCTCTG        |
| AR-F             | GCCTTGCTCTCTAGCCTCAA        |
| AR-R             | GGTCGTCCACGTGTAAGTTG        |
| RP11-1023L17.1-F | GATTTACTTTTGGGATACACTCATCAT |
| RP11-1023L17.1-R | ACAGGTGACTTCATCTTGGATT      |
| KLK2-F           | ATCGAACCAGAGGAGTTCTTG       |
| KLK2-R           | CCCTTTCCCCTCCAGATGTT        |
| KLK3-F           | GTGCTTGTGGCCTCTCGT          |
| KLK3-R           | CAGCAAGATCACGCTTTTGT        |
| TMPRSS2-F        | ACTGGCTCCTGACTTAA           |
| TMPRSS2-R        | TTATGGCACTTGGCAATG          |
| NKX3.1-F         | CAGAGACCGAGCCAGAAAGG        |
| NKX3.1-R         | CTGAGTGTGGGAGAAGGCAG        |
| KLK4-F           | GAAGTGAGTGCAGAGCTCCTA       |
| KLK4-R           | GTTAGCGAGCAAGGGTCTGT        |
| IRF1-F           | GGCCCTGACTCCAGCTACAA        |
| IRF1-R           | TACCCCTTCCCATCCACGTT        |
| PBX1-F           | CCAACTCGGCTGGTGGATAC        |
| PBX1-R           | TGTACATCTGACTGGCTGCG        |
| SNAI2-F          | TTCGGACCCACACATTACCT        |
| SNAI2-R          | GAAAAAGGCTTCTCCCCCGTG       |

| Name       | Sequence (5'to 3')     |
|------------|------------------------|
| CHK1-F     | TCTGCTCCTCTAGCTCTGCT   |
| CHK1-R     | TGGGAGACTCTGACACACCA   |
| RAD17-F    | TGGTGGGTCGGCTAGGAATA   |
| RAD17-R    | ACCATGAATTCACCTTGCTCCT |
| MYC-F      | TGGAAAACCAGCCTCCCG     |
| MYC-R      | TTCTCCTCCTCGTCGCACTA   |
| SREBP-1a-F | GCTCCCTAGGAAGGGCCGTA   |
| SREBP-1a-R | CGCCGACTTCACCTTCGAT    |
| USO1-F     | AAGATCGACAGACGGGGAAG   |
| USO1-R     | AGGGCACATAAGCCTTGGAC   |
| NONO-F     | ACAGATGCAGTGAAGGCTC    |
| NONO-R     | CTCGTTCCTTGTGAAATTGCTG |

**Table S5.** Primers used in ChIP-PCR.

| Name            | Sequence (5'to 3')          |
|-----------------|-----------------------------|
| ARE1-F          | TACATCATAGACCTCCCAAACAG     |
| ARE1-R          | GGGAGAGGGACCATTATCTGGC      |
| ARE2-F          | CCCTAGGATAGATTCTTGAAGA      |
| ARE2-R          | TTTTATTGTAGTTTTGGTTGCATAA   |
| PSA enhancer-F  | TGGGACAACCTTGCAAACCTG       |
| PSA enhancer-R  | CCAGAGTAGGTCTGTTTTCAATCCA   |
| miR-125b-F      | TACAATTCCTGTGAAATGAGAGCAC   |
| miR-125b-R      | TTCTATGTGATAATGAAAAAACCCCTA |
| XBP1-promoter-F | TCTGGAAAGCTCTCGGTTTG        |
| XBP1-promoter-R | AATCCCTGGCCAAAGGTACT        |
| KLK2-F          | TGTGTGCAGGAAGAGCGGGTGAA     |
| KLK2-R          | ACCTGACCCTCCATTCTAACTGGT    |
| KLK3-F          | TGGGACAACCTTGCAAACCTG       |
| KLK3-R          | CCAGAGTAGGTCTGTTTTCAATCCA   |
| FKBP5-F         | ATTATCCGGAGAACCAAACG        |
| FKBP5-R         | ACATCCTTCCACCACAG           |
| TMPRSS2-F       | CAGGAGTGTACGGGAATGTGATGGT   |
| TMPRSS2-R       | GATTAGCCGTCTGCCCTCATTTGT    |
| NEDD4L-F        | CAACTTGGACTCGGCCAATC        |
| NEDD4L-R        | GTTACTGTTGGCGAGCTGAG        |
| CTBP1-F         | ACACCCAAGGTCCTCAG           |
| CTBP1-R         | TCCTTTGTTTCACAGAGTCAG       |

**Table S6.** Primers used in Plasmid construction.

| <b>Name</b>        | <b>Sequence (5'to 3')</b>                      |
|--------------------|------------------------------------------------|
| AC016745.3-clone-F | AGCTGGGAAAACGGC                                |
| AC016745.3-clone-R | ATAACAGAACCTATACTATAAAATGG                     |
| AC016745.3-T7-F    | TAATACGACTCACTATAGGGAGCTGGGAAAACGGC            |
| AC016745.3-T7-R    | TAATACGACTCACTATAGGGATAACAGAACCTATACTATAAAATGG |
| NONO-clone-F       | ATGCAGAGTAATAAAACTTTTAAGTTGA                   |
| NONO-clone-R       | TTAGTATCGGCGACGTTTGTTG                         |
